# Supplementary material for: Dysfunction of fibroblasts of extrarenal origin underlies renal fibrosis and renal anemia in mice
Source: JCI journal article supplement (doi:10.1172/jci57301), 2011-09-12
Supplement: sd1 [file 1]

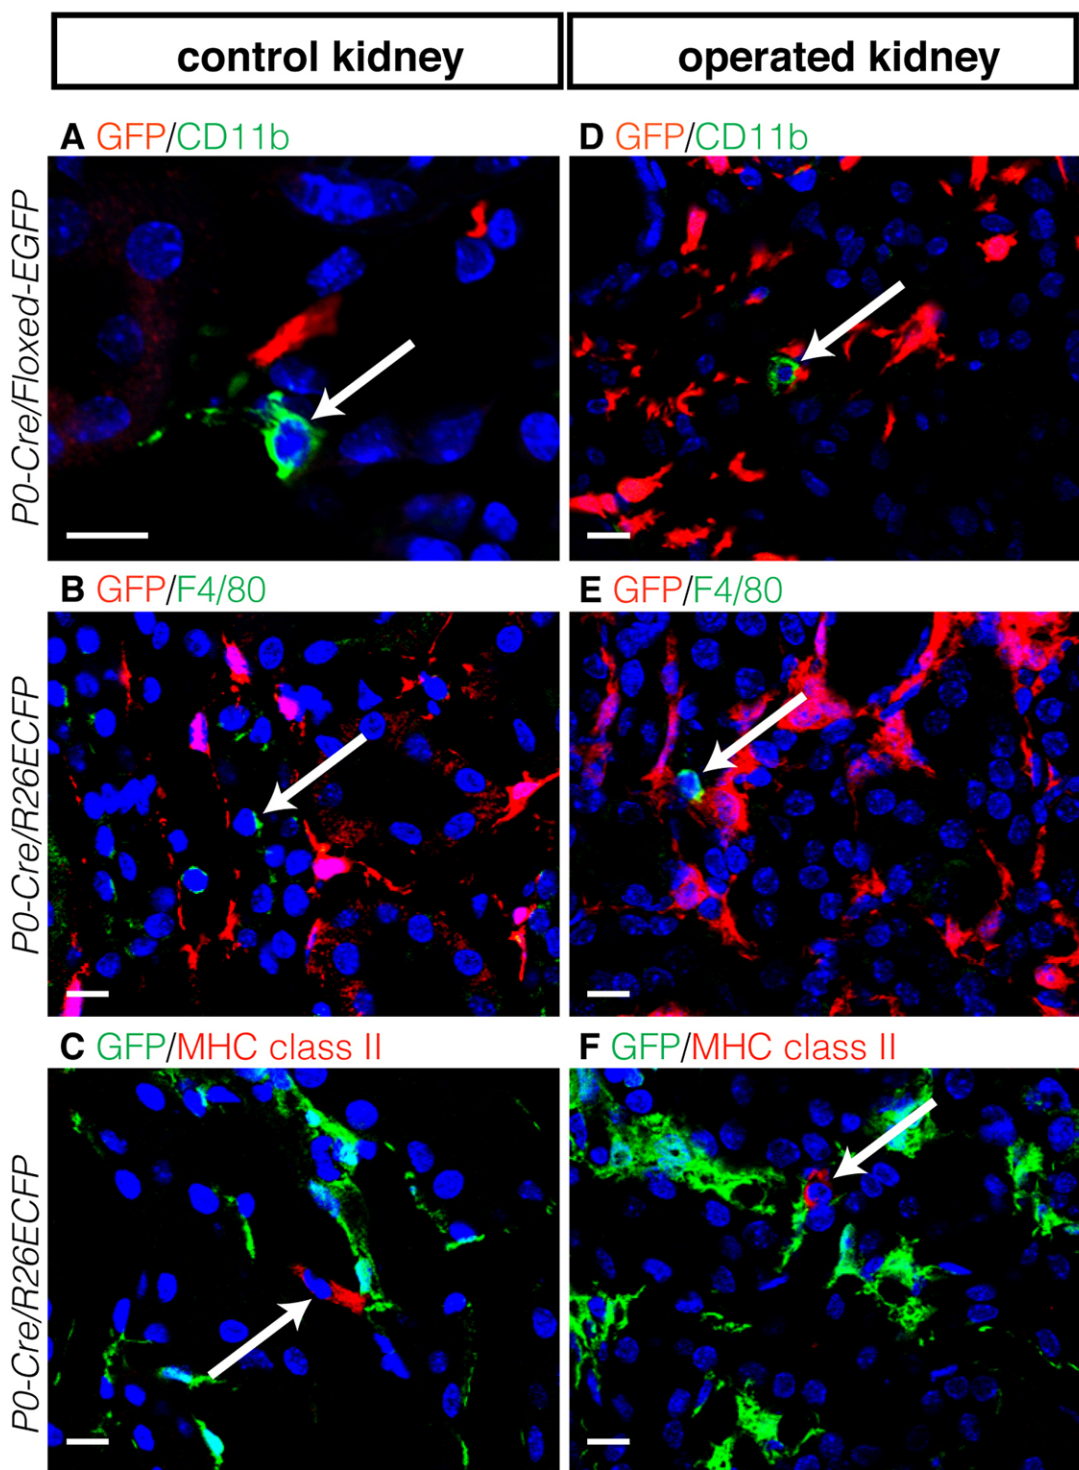

### Supplementary Figure 1

#### ***P0-Cre* fate-mapped cells in the kidney are not inflammatory cells.**

EGFP<sup>+</sup> cells in *P0-Cre/Floxed-EGFP* mice and ECFP<sup>+</sup> cells in *P0-Cre/R26ECFP* mice did not express CD11b (**A, D**), F4/80 (**B, E**), or MHC class II (**C, F**) in the control kidney (**A-C**) as well as in the operated kidney (**D-F**).

Scale bars: 10  $\mu$ m. Arrows indicate inflammatory cells.

GFP/TH/DAPI

P0-Cre/R26ECFP

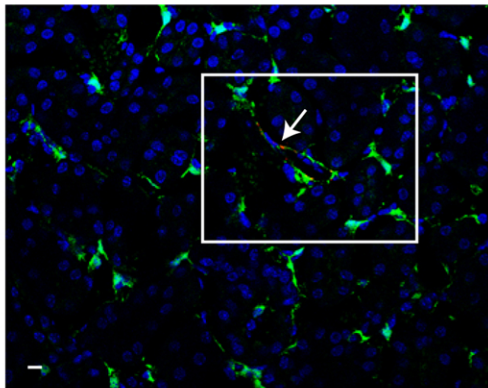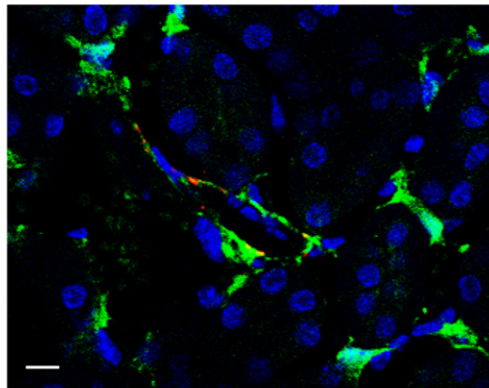

## Supplementary Figure 2

**Very few ECFP+ cells expressed tyrosine hydroxylase, whereas most ECFP+ cells did not.**

Very few ECFP+ cells, especially the ones around the vessels were positive for tyrosine hydroxylase, whereas most ECFP+ cells were not. The arrow indicates ECFP/tyrosine hydroxylase double-positive cells. TH: tyrosine hydroxylase.

Scale bars: 10  $\mu$ m.

**A** E11.5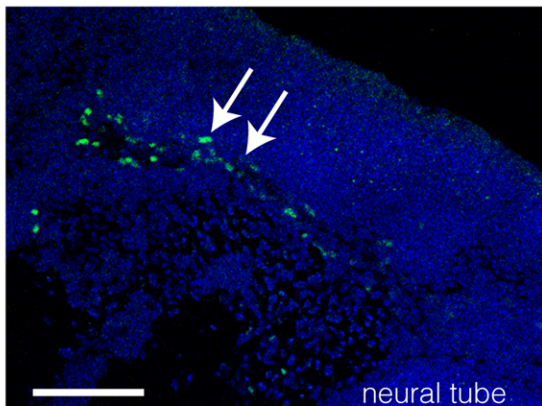**B** E13.5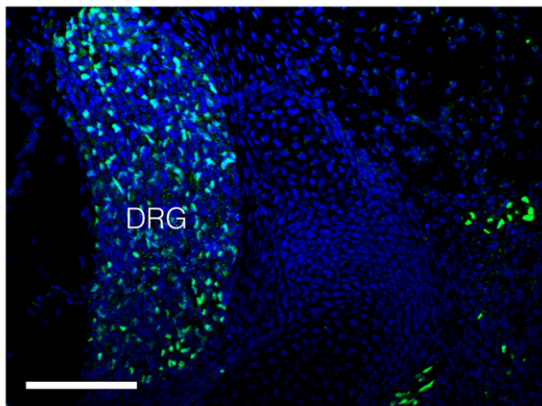**C** E13.5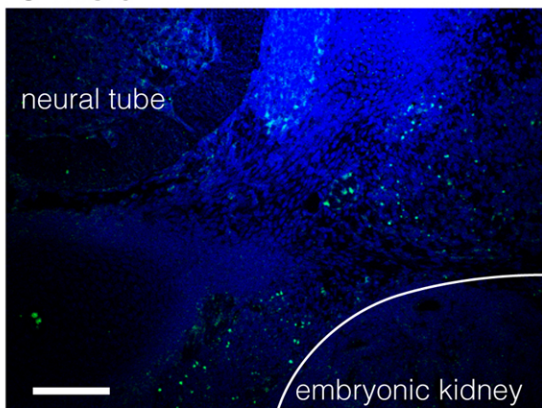**D** E16.5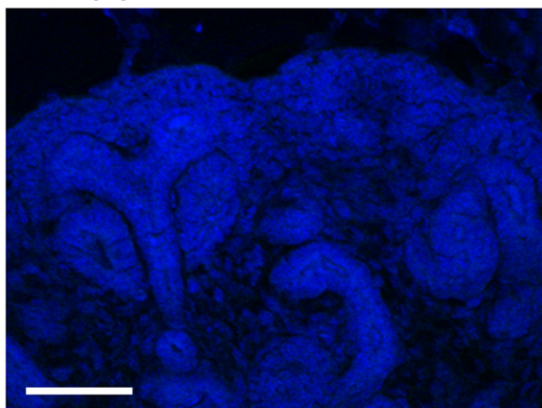**E** adult kidney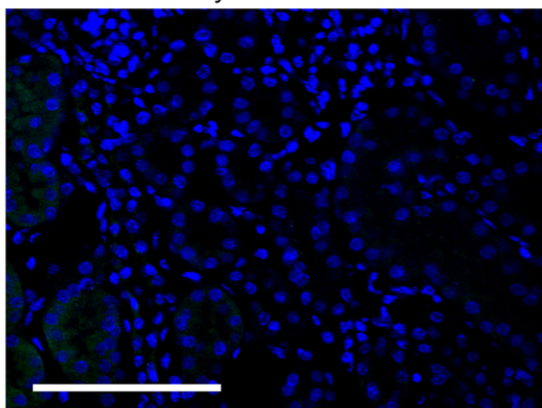**F** operated kidney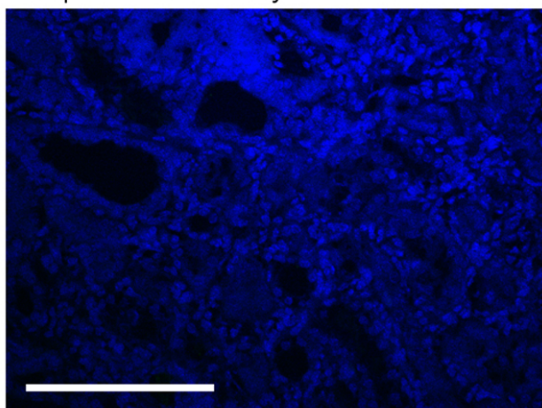**Supplementary Figure 3****Absence of Cre protein in the kidneys of *P0-Cre* mice.**

(**A, B**) Cre protein was detected in the migrating neural crest cells (arrows) at E11.5 (**A**) as well as in the dorsal root ganglia (**B**) in *P0-Cre* mice. (**C-F**) Cre protein was undetectable either in the embryonic kidneys (**C, D**), adult kidneys (**E**), or operated fibrotic kidneys (**F**) of *P0-Cre* mice. Scale bars: 100  $\mu\text{m}$  except for **C** (50  $\mu\text{m}$ ).

**A** E14.5 kidney

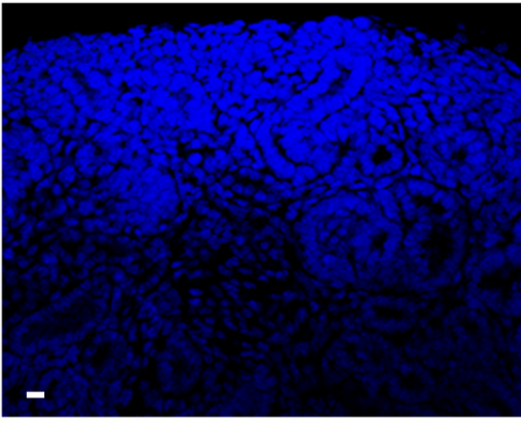

**B** E16.5 kidney

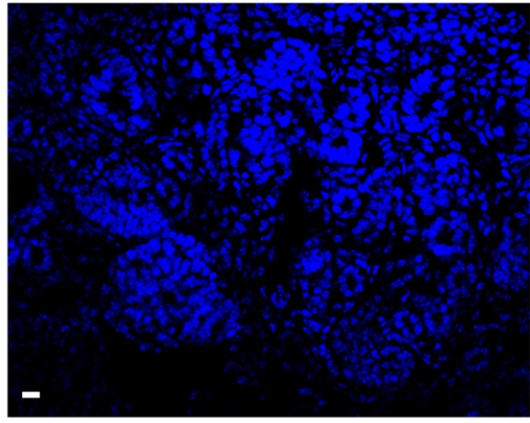

**C** adult kidney

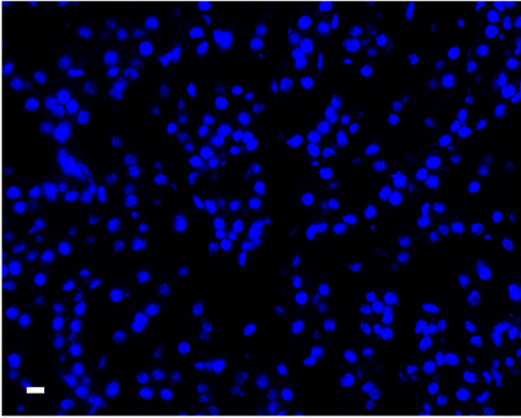

**D** operated kidney

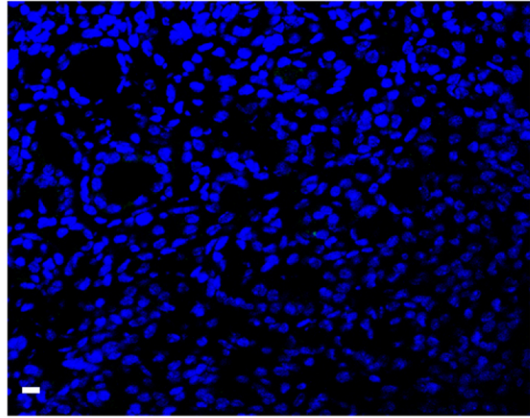

**E** Sciatic nerve

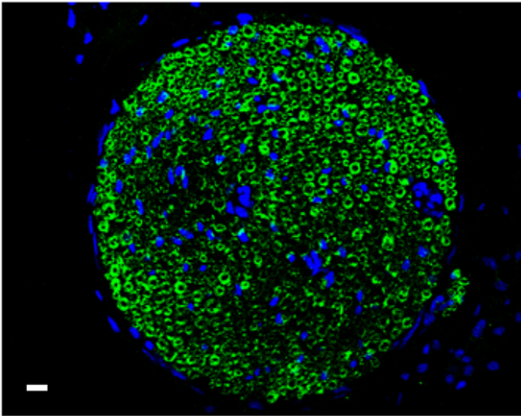

## Supplementary Figure 4

### Absence of P0 protein in the kidneys.

(**A-D**) P0 protein was undetectable either in the embryonic kidneys (**A, B**), adult kidneys (**C**), or operated fibrotic kidneys (**D**) of wild-type mice. (**E**) Positive control for the immunostaining of P0 protein. P0 protein is highly expressed in the sciatic nerve. Scale bars: 10  $\mu$ m.

GFP/ $\alpha$ SMA/DAPI

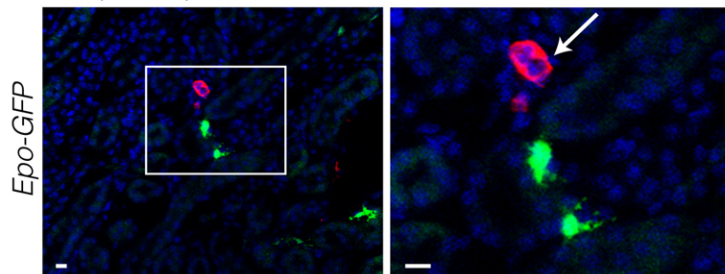

### Supplementary Figure 5

#### EPO-producing cells in the healthy kidney do not express $\alpha$ SMA.

Double immunostaining revealed that GFP+ cells in the healthy kidney of *Epo-GFP* mice were negative for  $\alpha$ SMA. Arrow indicates  $\alpha$ SMA-positive vascular smooth muscle cells.

Scale bars: 10  $\mu$ m.

GFP

$\alpha$ SMA

GFP/ $\alpha$ SMA/DAPI

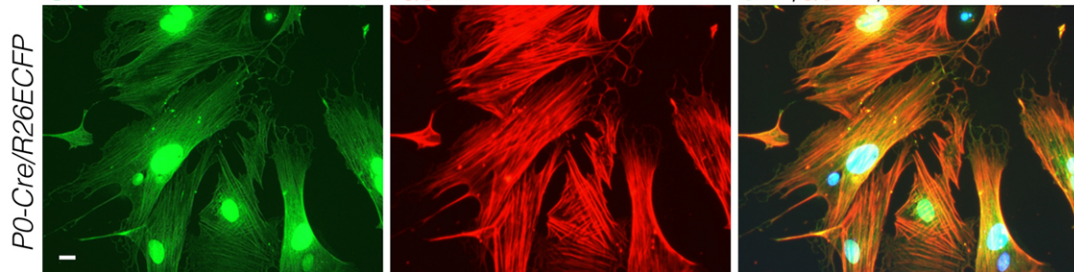

### Supplementary Figure 6

#### Most, if not all, myfibroblasts obtained from fibrotic kidneys of *P0-Cre/R26ECFP* mice were positive for CFP.

Immunostaining revealed that most, if not all,  $\alpha$ SMA+ myfibroblasts were positive for ECFP.

ECFP was visualized by immunostaining with GFP antibody. Scale bar: 10  $\mu$ m.

Healthy kidney

Folic acid nephrotoxicity

Severe IR injury

GFP/MHC/DAPI

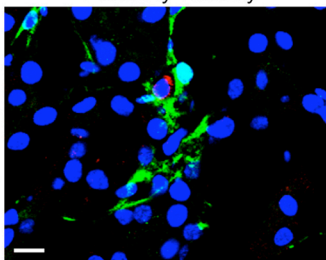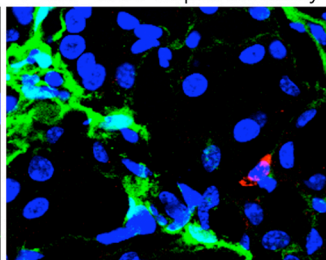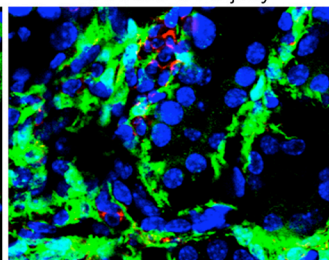

GFP/F4/80/DAPI

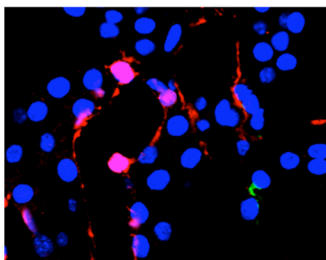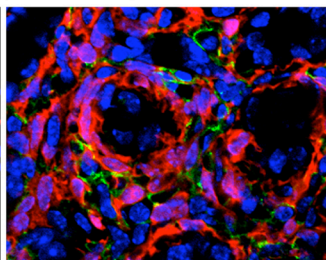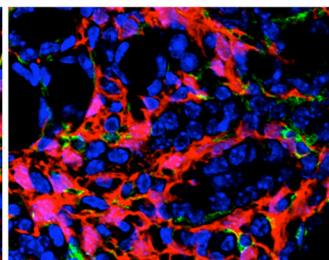

GFP/CD45/DAPI

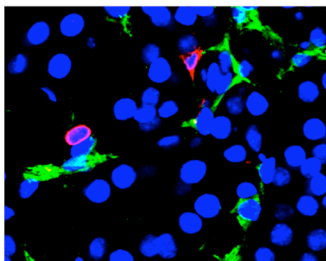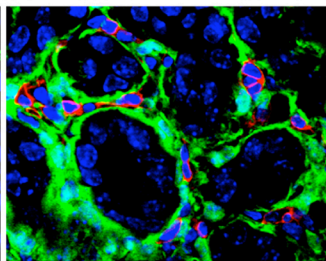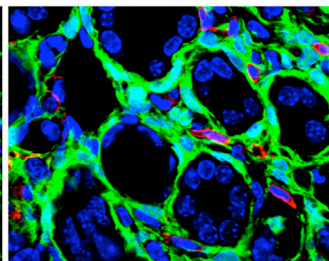

GFP/PECAM/DAPI

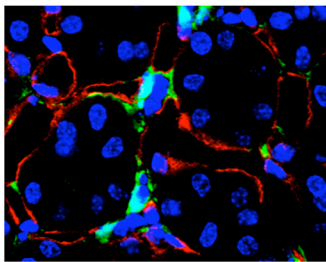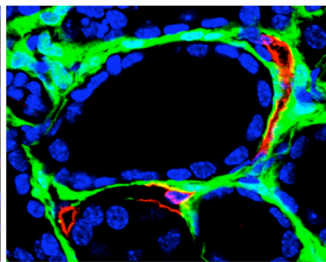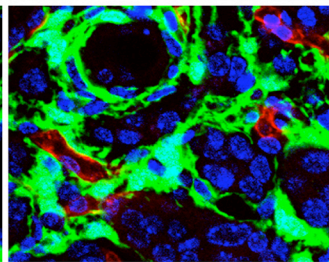

### Supplementary Figure 7

#### ECFP positive cells in *P0-Cre/R26ECFP* mice were neither inflammatory cells nor endothelial cells.

Most, if not all, ECFP positive cells in *P0-Cre/R26ECFP* mice did not colocalize with MHC class II, F4/80, CD45 or PECAM positive cells either in the healthy kidney or the fibrotic kidney in folic acid nephrotoxicity and severe ischemic reperfusion (IR) injury. Scale bar: 10  $\mu$ m.

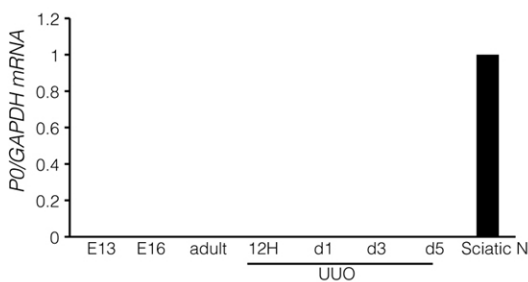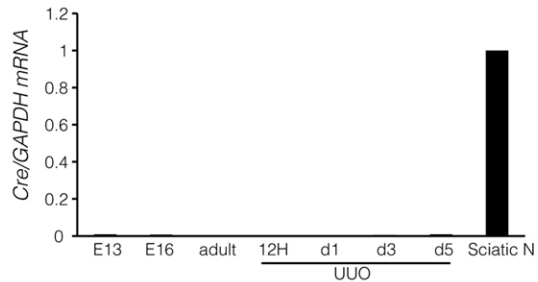

### Supplementary Figure 8

**The expression of *P0* and *Cre* mRNA was almost undetectable either in embryonic kidneys or in adult fibrotic kidneys.**

The expression of *P0* and *Cre* mRNA was measured in the embryonic kidneys and the fibrotic kidneys of *P0-Cre:R26ECFP* mice. Expression of *P0* and *Cre* was normalized to the expression of *GAPDH* and expressed relative to the expression in the sciatic nerve.

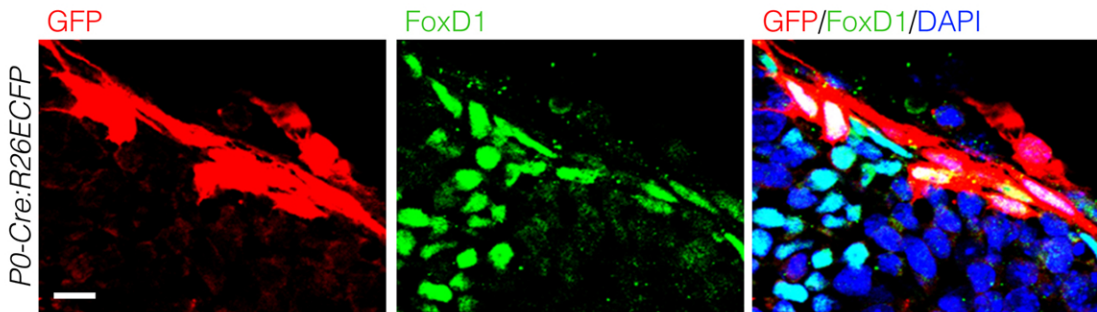

### Supplementary Figure 9

**Some *P0-Cre* fate-mapped cells express FoxD1, when they enter the embryonic kidneys at E13.5. Scale bar: 10  $\mu$ m.**

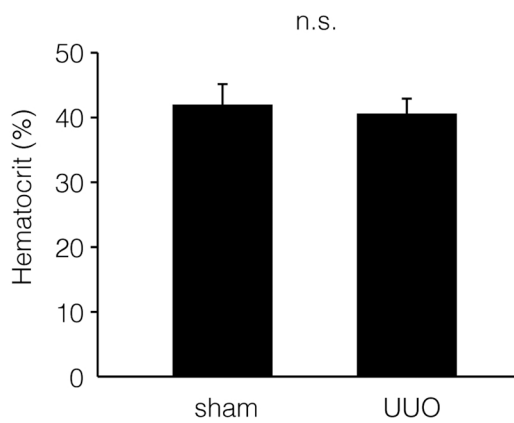

### Supplementary Figure 10

#### Mice with UUO were not anemic.

Hematocrit of the mice with UUO was not significantly reduced compared to sham-operated mice (n = 5/group). n.s.: not significant.

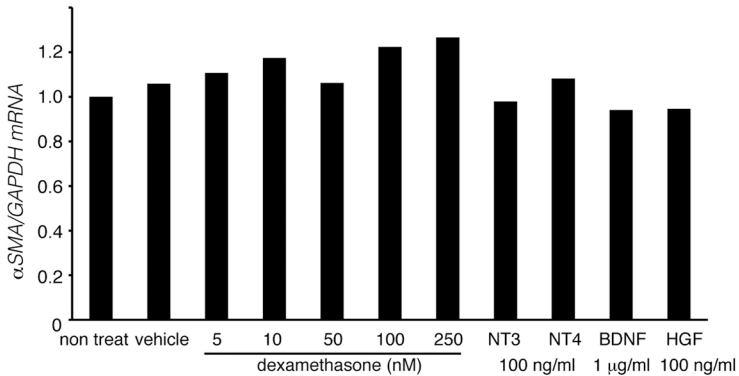

### Supplementary Figure 11

#### Re-expression of EPO in Figure 5E was not associated with decreased $\alpha$ SMA in myofibroblasts.

The expression of  $\alpha$ SMA in cultured myofibroblasts was not reduced by the administration of low-dose dexamethasone, neurotrophins, and HGF. Expression of  $\alpha$ SMA was normalized to that of *GAPDH* and expressed relative to that in the cells without any treatment. Vehicle: 0.05% ethanol for the control of dexamethasone.
